# Supplementary material
Source: MDPI journal article supplement (https://www.mdpi.com/2071-1050/13/16/9455)
Supplement: s1 [file s1]

## **SUPPLEMENTARY MATERIALS**

### **Development of a Novel Helical-Ribbon Mixer Dryer for Conversion of Rural Slaughterhouse Wastes to an Organic Fertilizer and Implications in the Rural Circular Economy**

Ankita Bhowmik, Shantanu Bhunia, Anupam Debsarkar, Rambilash Mallick, Malancha Roy and Joydeep Mukherjee\*

**Table S1.** Changes in drying rate and product moisture with the progression of time observed during the operation in LPG fuelled helical-ribbon mixer dryer

| Time, t<br>(min) | Moisture, x<br>(%, wet basis) | Drying rate<br>(dx/dt) | Moisture<br>removal |
|------------------|-------------------------------|------------------------|---------------------|
| 0                | 85.37                         | 0                      | 0                   |
| 15               | 84.42                         | 0.06                   | 0.95                |
| 30               | 81.9                          | 0.168                  | 3.47                |
| 45               | 72.36                         | 0.43                   | 13.01               |
| 60               | 62.86                         | 0.633                  | 22.51               |
| 75               | 53.38                         | 0.632                  | 31.99               |
| 90               | 43.83                         | 0.635                  | 41.54               |
| 105              | 34.31                         | 0.634                  | 51.06               |
| 120              | 24.79                         | 0.634                  | 60.58               |
| 135              | 19.09                         | 0.45                   | 66.28               |
| 150              | 15.56                         | 0.23                   | 69.81               |
| 180              | 15.56                         | 0.23                   | 69.81               |
| 195              | 15.56                         | 0                      | 69.81               |

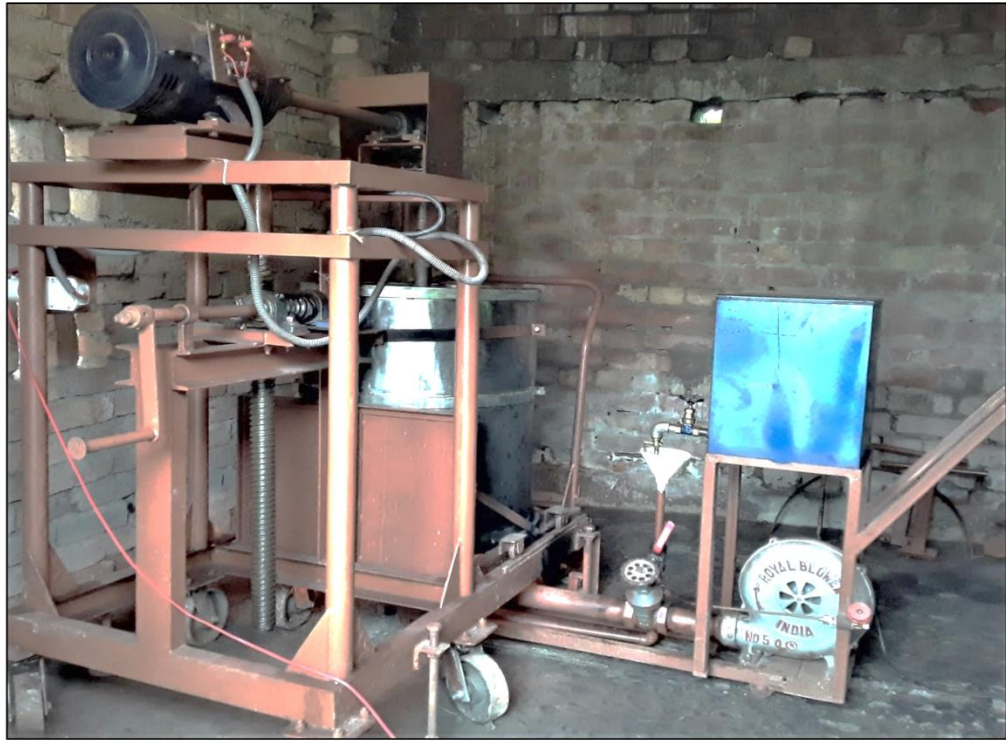

**Figure S1.** Helical-ribbon mixer dryer dryer constructed based on Figure 1 and currently installed in one of the rural abattoirs of Magrahat, South 24 Parganas, West Bengal (India).

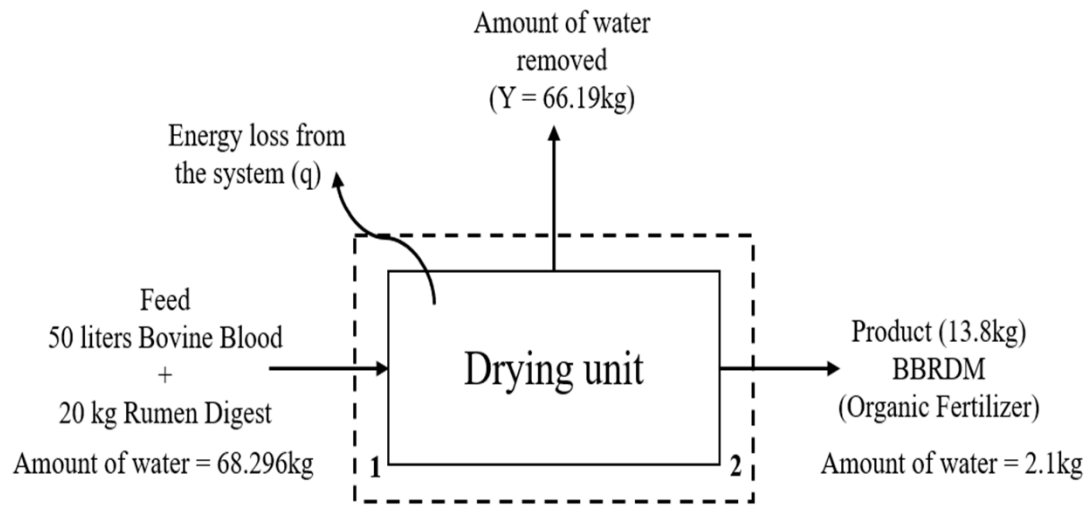

**Figure S2.** Mass balance of moisture removal from slaughterhouse waste in the developed helical-ribbon mixer dryer, where 1 and 2 represents input and output sides of the drying system, respectively.

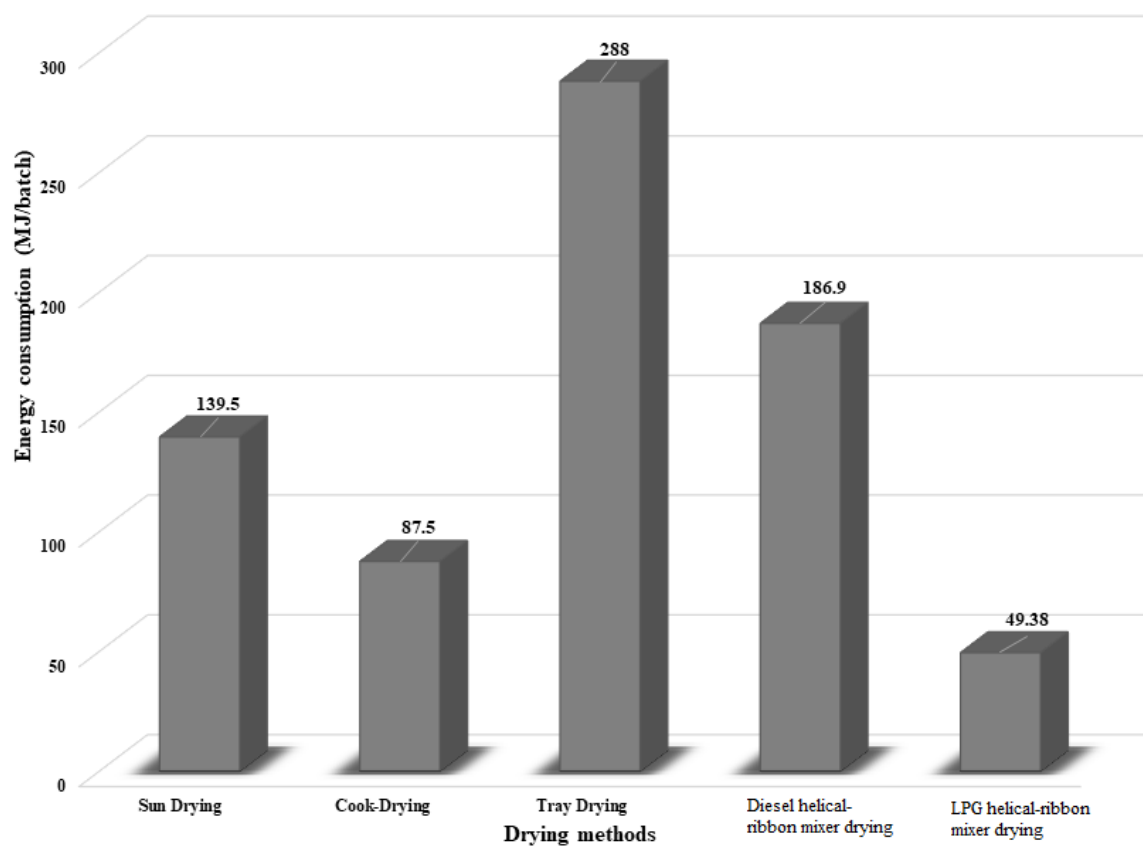

**Figure S3.** Drying techniques and their energy consumption adopted for rural slaughterhouse waste recycling in this study.

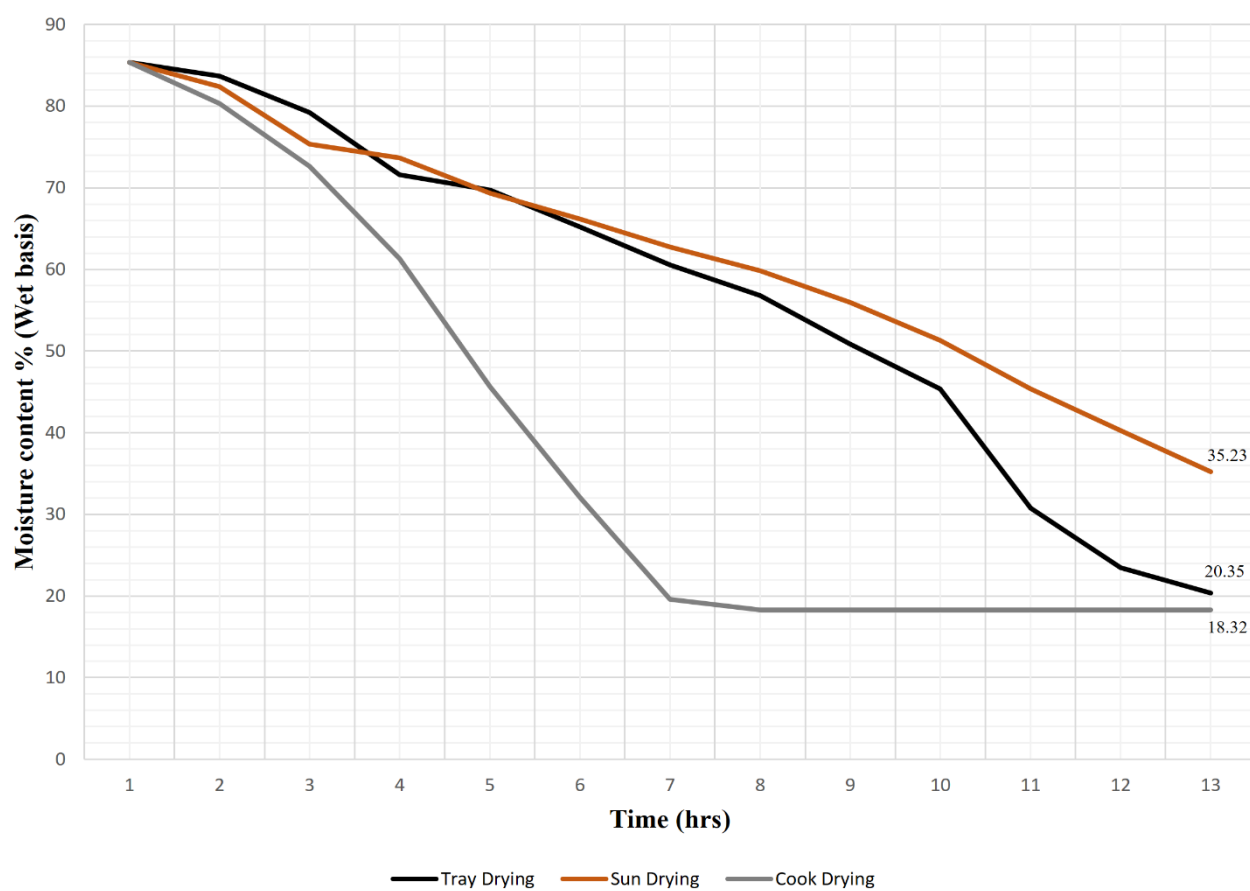

**Figure S4.** Comparative study of recycling alternatives applied previously to rural slaughterhouse wastes namely tray-drying, sun drying and cook-drying based on achieved final moisture after 13 hours of processing.



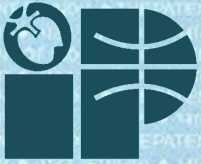

**INTELLECTUAL  
PROPERTY INDIA**

PATENTS | DESIGNS | TRADE MARKS  
GEOGRAPHICAL INDICATIONS

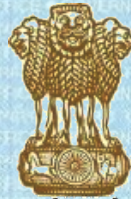

सत्यमेव जयते

भारत सरकार  
GOVERNMENT OF INDIA

पेटेंट कार्यालय  
THE PATENT OFFICE

पेटेंट प्रमाणपत्र  
PATENT CERTIFICATE  
(Rule 74 Of The Patents Rules)

क्रमांक : 033116454  
SL No :

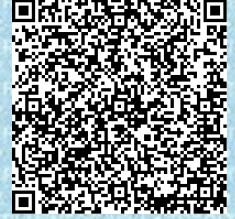

पेटेंट सं. / Patent No. : 370569  
आवेदन सं. / Application No. : 202031033116  
फाइल करने की तारीख / Date of Filing : 01/08/2020  
पेटेंटी / Patentee : 1.Ms. Ankita Bhowmik 2.Mr. Shantanu Bhunia 3.Dr. Joydeep Mukherjee

प्रमाणित किया जाता है कि पेटेंटी को उपरोक्त आवेदन में यथाप्रकटित AN APPARATUS FOR RECYCLING SLAUGHTERHOUSE WASTE AND METHOD THEREOF नामक आविष्कार के लिए, पेटेंट अधिनियम, १९७० के उपबंधों के अनुसार आज तारीख 1st day of August 2020 से बीस वर्ष की अवधि के लिए पेटेंट अनुदत्त किया गया है।

It is hereby certified that a patent has been granted to the patentee for an invention entitled AN APPARATUS FOR RECYCLING SLAUGHTERHOUSE WASTE AND METHOD THEREOF as disclosed in the above mentioned application for the term of 20 years from the 1st day of August 2020 in accordance with the provisions of the Patents Act, 1970.

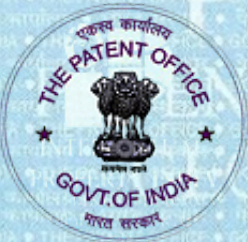

अनुदान की तारीख : 29/06/2021  
Date of Grant :

पेटेंट नियंत्रक  
Controller of Patent

टिप्पणी - इस पेटेंट के नवीकरण के लिए फीस, यदि इसे बनाए रखा जाना है, 1st day of August 2022 को और उसके पश्चात प्रत्येक वर्ष में उसी दिन देय होगी।

Note. - The fees for renewal of this patent, if it is to be maintained will fall / has fallen due on 1st day of August 2022 and on the same day in every year thereafter.
