# Supplementary material
Source: MDPI journal article supplement (https://www.mdpi.com/2071-1050/13/16/9455)
Supplement: s1 [file s1]

Archive with 2 entries (2 files):
- Bhowmik et al. (Supplementary Video S.1).mp4
- Bhowmik et al. (Supplementary materials).pdf
